# Supplementary material for: A concise synthesis of a rigid isomannide-based diphosphine ligand and structural characterisation of an alkoxyphosphonium intermediateElectronic Supplementary Information (ESI) available: characterisation data for 2, 4, ddppm and ddppg (including structural data for ddppg), experimental for hydrogenation reactions.
Source: Royal Society of Chemistry journal article supplement (doi:10.1039/b401301h), 2004-01-01
Supplement: b401301h.doc [file b401301h.doc]

Electronic Supplementary Information for:

**A concise synthesis of a rigid isomannide-based diphosphine ligand and structural characterisation of an alkoxyphosphonium intermediate.**

Cristina Carcedo, Athanasia Dervisi,*** Ian A. Fallis , Liling Ooi and K. M. Abdul Malik

Department of Chemistry, Cardiff University, PO Box 912, Cardiff, CF10 3TB, UK. Fax: 029 20874030; Tel: 029 20874081; E-mail: dervisia@cardiff.ac.uk.

Data for ddppm: (Found: C, 73.82; H, 5.57. C30H28O2P2 requires C, 74.68; H, 5.85%); **(CDCl3, 400MHz) 2.94 (m, 2H, C*H*PPh2), 3.88 (m, 4H, C*H*2), 4.52 (m, 2H, *H*CCH), 7.2-7.4 (m, 20H);** **P (CDCl3, 121MHz) –21.4; **C (CDCl3, 100 MHz) 45.78 (d, 2*J*CP 11.5 Hz, 2C, *C*H2), 73.04 (d, 1*J*CP 26.5 Hz, 2C, *C*HP), 86.12 (m, 2C, H*C*CH), 128.63 (s, 4C, Ar), 128.65 (m, 4C,Ar), 129.03 (m, 4C, Ar), 133.04 (d, *J*CP 19.6 Hz, 4C, Ar), 133.51 (d, *J*CP 21.4 Hz, 4C, Ar), 136.69 (d, *J*CP 13.3 Hz, 2C, Ar), 137.44 (d *J*CP 15.0 Hz, 2C, Ar); MS (accurate mass, ES+) calculated mass for [M+H]+: 483.1637, measured: 483.1636.

Data for ddppg: (Found: C, 73.82; H, 5.75. C30H28O2P2 requires C, 74.68; H, 5.85%); **(CDCl3, 400MHz) 2.88 (m, 1H, *exo* C*H*PPh2), 3.02 (m, 1H, *endo* C*H*PPh2), 3.58 (m, 1H, C*H*2), 3.75 (m, 1H, C*H*2), 3.83 (m, 1H, C*H*2), 4.09 (m, 1H, C*H*2), 4.44 (m, 1H, *H*CCH), 4.55 (m, 1H, *H*CCH), 7.15-7.45 (m, 20H, Ar);** **P (CDCl3, 121MHz) -13.1 (s), –22.2 (s); **C (CDCl3, 100 MHz) 44.94 (m, 2C, *C*H2), 71.25 (d, 1*J*CP 26.6 Hz, 1C, *C*HP), 72.37 (d, 1C, 1*J*CP 23.6 Hz, *C*HP), 85.56 (m, 1C, H*C*CH), 88.52 (dd, 1C, 2*J*CP 24.8 Hz, 3*J*CP 3.5 Hz, H*C*CH), 128.5-129.5 (m, 12C, Ar), 132.7-133.9 (m, 8C,Ar), 136.5-137.4 (m, 4C, Ar).

Crystal data for ddppg: C30H28O2P2, *M* = 482.46, orthorombic, *P*212121, *a* = 9.3120(4), *b* = 10.1516(4), c = 26.5195(14) Å3, *V* = 2506.9(2) Å3, *Z* = 4, *D*c = 1.278 g cm-3, **(Mo-Kα) = 0.71073 Å), *T* = 150(2) K, 13050 reflections collected, 4394 independent reflections [*R*(int) = 0.0812], *F*2 refinement, *R*1 = 0.0588, *wR*2 = 0.1249 for [*I* > 2(*I*)], 307 parameters. The absolute structure was correctly indicated by the Flack parameter being zero within experimental error [-0.01(14)].


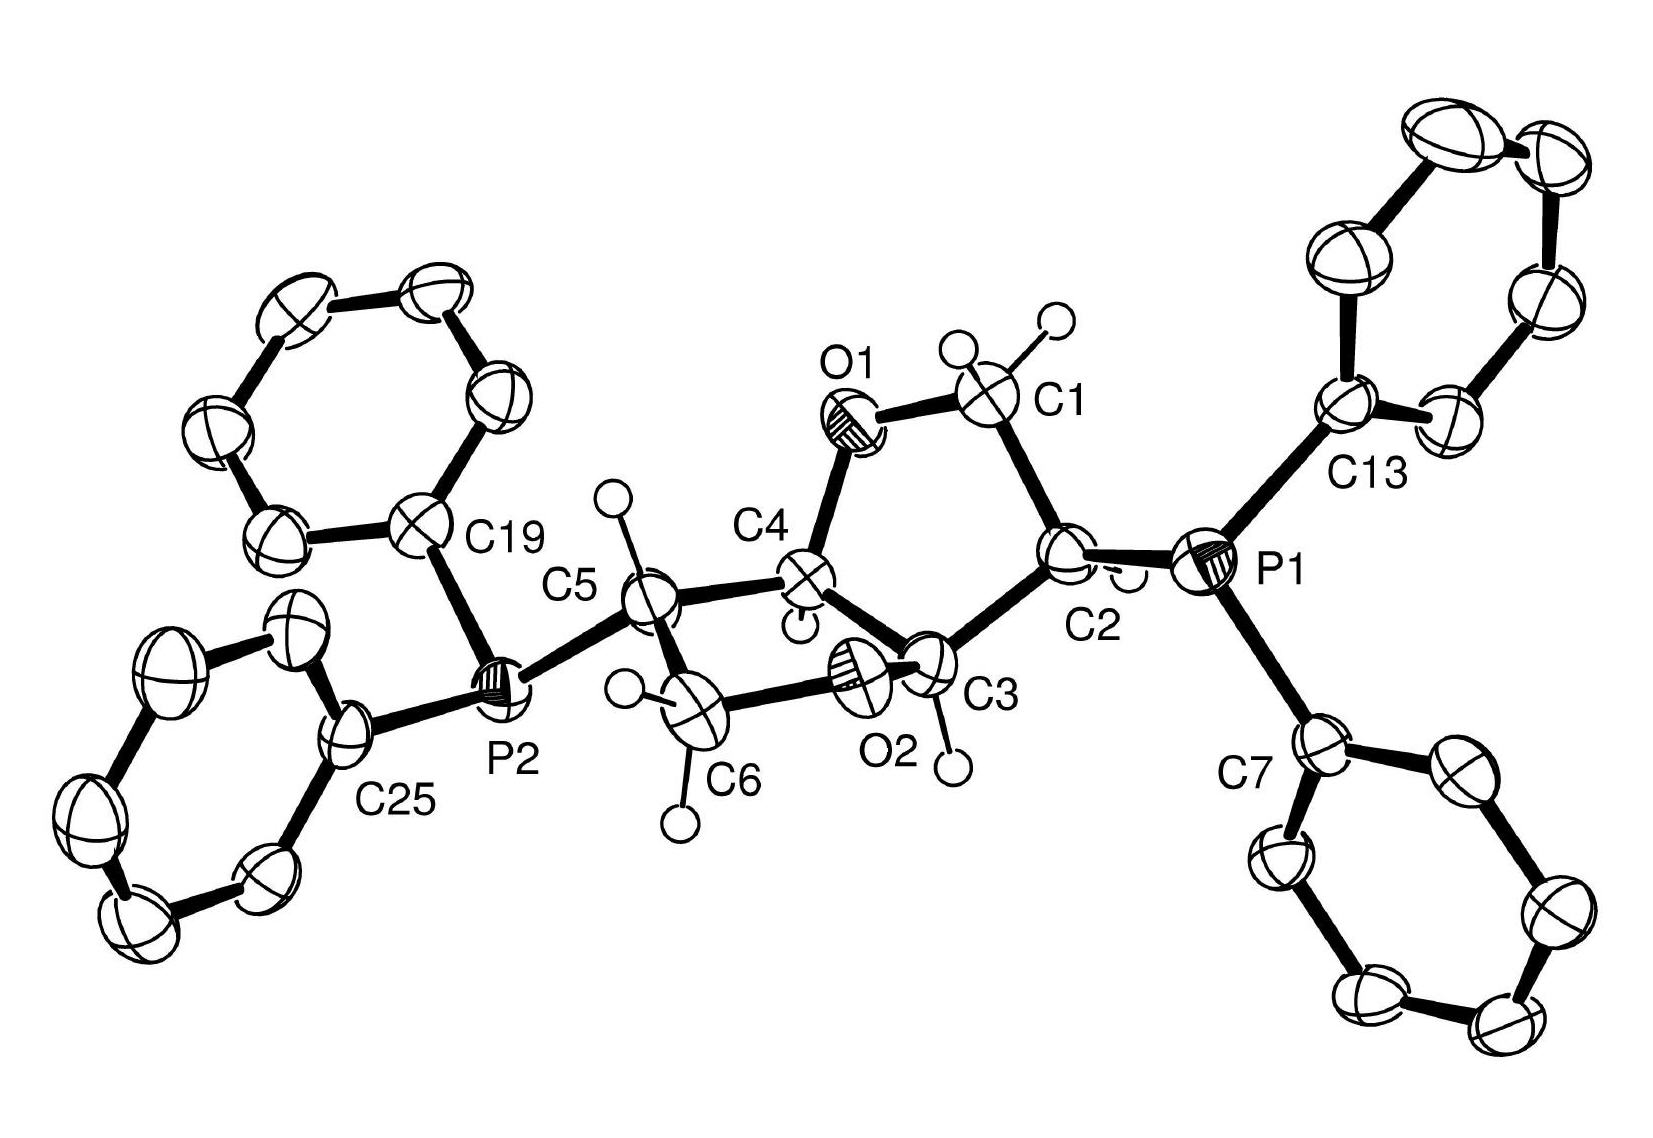


Fig. 1 ORTEP ellipsoid plot at 30% probability of the molecular structure of ddppg. Aromatic hydrogens have been omitted for clarity.

Data for 2:**(Found: C, 60.57; H, 4.46. C42H38O4P2Br2 requires C, 60.88; H, 4.63%); **(CDCl3, 400MHz) 4.20 (m, 4H, C*H*2), 4.32 (d, 2H, C*H*OPPh3), 5.28 (m, 2H, *H*CCH), 7.73-7.82 (m, 20H, Ar);** **P (CDCl3, 121MHz) 65.0 (s); **C (CDCl3, 100 MHz) 78.60 (m), 81.39 (m), 131.00 (m), 134.30 (m), 136.94 (m).

Data for [Rh(ddppm)(CH3CN)2][BF4], 4: **(CD3CN, 400MHz) 3.16 (m, 2H, C*H*PPh2), 3.91 (m, 2H, C*H*2), 4.16 (m, 2H, C*H*2), 4.83 (m, 2H, CC*H*), 7.2-7.4 (m, 20H);** **P (CDCl3, 121MHz) 24.5 (1*J*PRh = 143 Hz); **C (CD3CN, 100 MHz) 42.03 (m, 2C, *C*H2), 72.13 (m, 2C, *C*HP), 83.26 (m, 2C, *C*HP), 127.62 (m, 4C, Ar), 127.80 (m, 4C, Ar), 129.45 (s, 2C, Ar), 129.87 (s, 2C, Ar), 133.42 (m, 4C, Ar), 133.93 (m, 4C, Ar); MS (accurate mass, ES+) calculated mass for [M-BF4]+: 667.1145, measured: 667.1147; [M-BF4-CH3CN]+: 626.2, [M-BF4-2CH3CN]+: 585.2.

Hydrogenation reaction

In a typical run, a Schlenk tube was filled with a methanol solution (15 mL) of substrate (1 mmol), the metal precursor (0.01 mmol) and ddppm (4.8 mg, 0.01 mmol) under argon. The contents of the Schlenk tube were placed briefly under vacuum and subsequently purged with H2. The reaction solution was then stirred under H2 (1 atm) at room temperature for 24 hours. After the end of the reaction the obtained solution was filtered through a short pad of silica gel to remove the catalyst. Conversion and enantiomeric excesses were determined by chiral HPLC.
